# Supplementary material for: Microbiota and Metabolite Modifications after Dietary Exclusion of Dairy Products and Reduced Consumption of Fermented Food in Young and Older Men
Source: MDPI journal article supplement (doi:10.3390/nu13061905), 2021-06-01
Supplement: s1 [file s1]

**Supplementary Material**

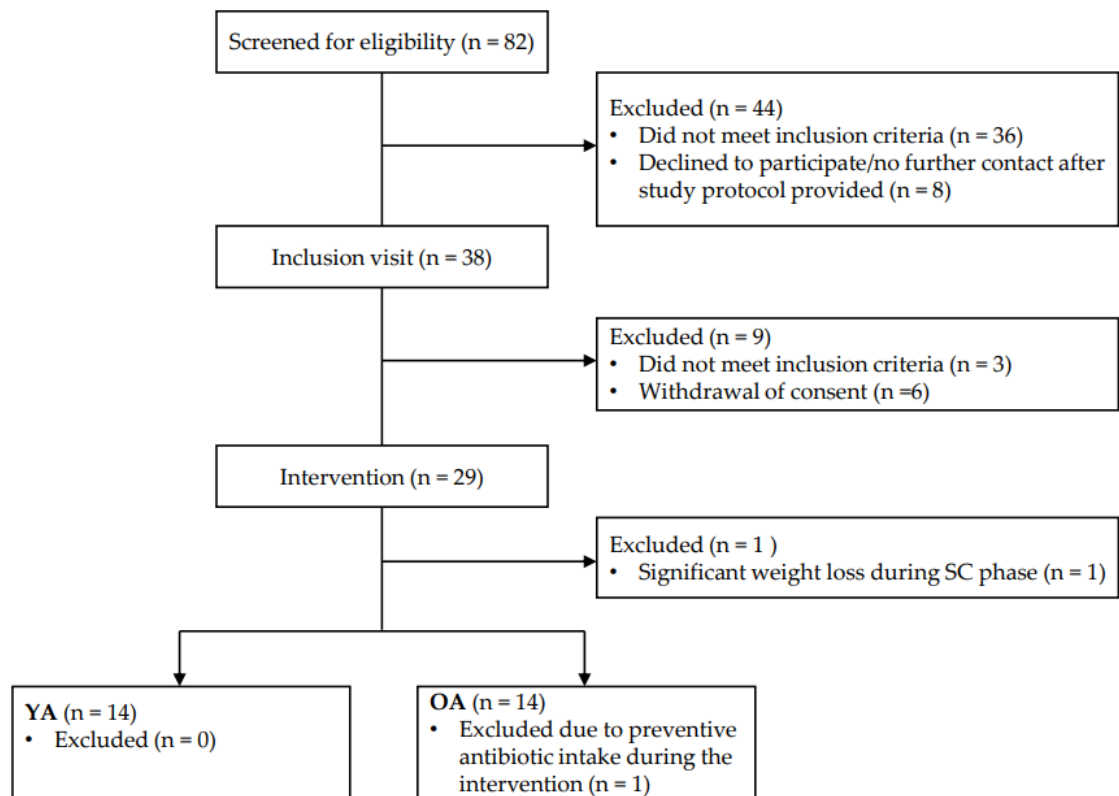

**Figure S1.** Flow diagram of the participants of the study. OA, older adults; YA, young adults.

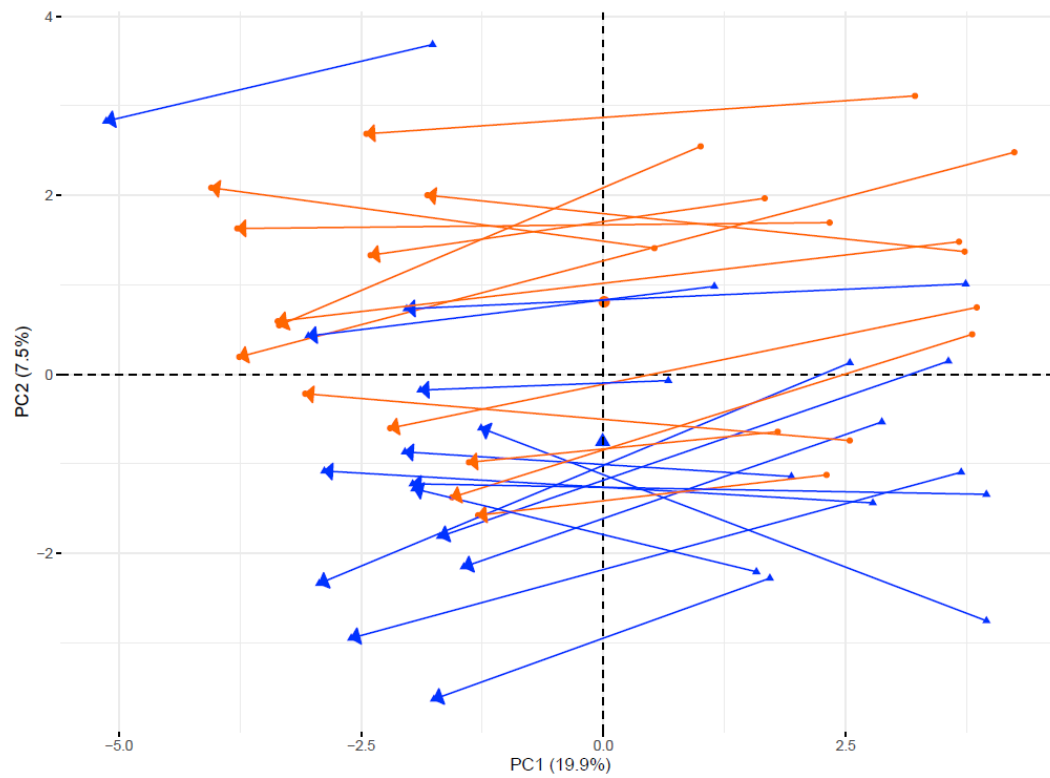

**Figure S2.** Principal component analysis (PCA) plot of individual dietary modification during the semi-controlled (SC) phase. Young adults (YA): blue arrow; Older adults (OA): orange arrow. PC, principal component.

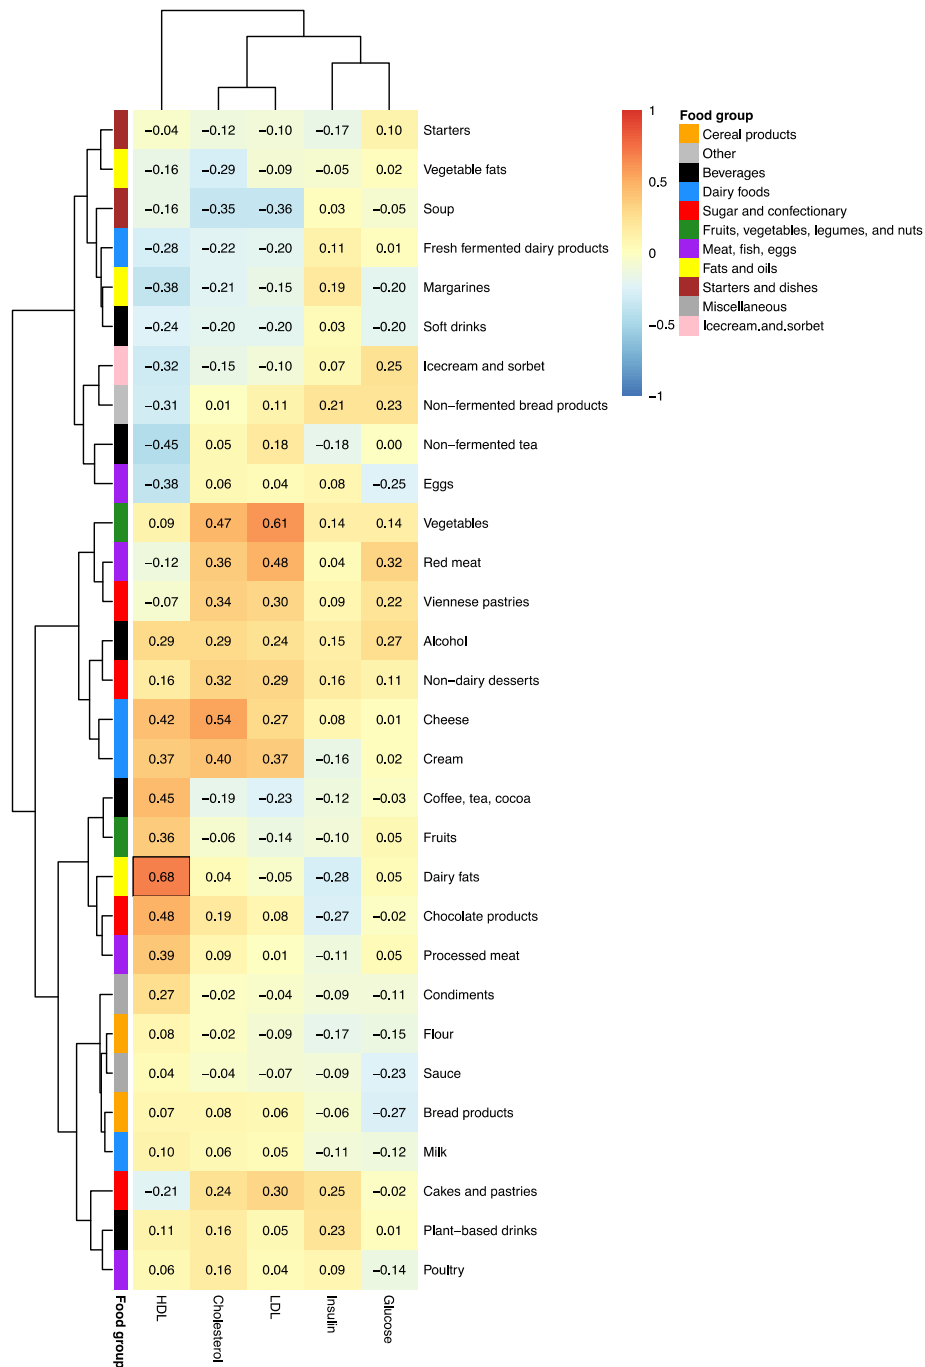

**Figure S3.** Associations between biochemical parameters and food subgroups that are significantly changed during the SC phase evaluated using Spearman's correlation. Associations are colored and labelled according to Spearman rho, from -1 (negative association) to 1 (positive association). Significant associations are highlighted by a black border (FDR < 0.05). Hierarchical clustering is performed by Ward D2 method using Euclidean distances. Side colors show food group classifications.

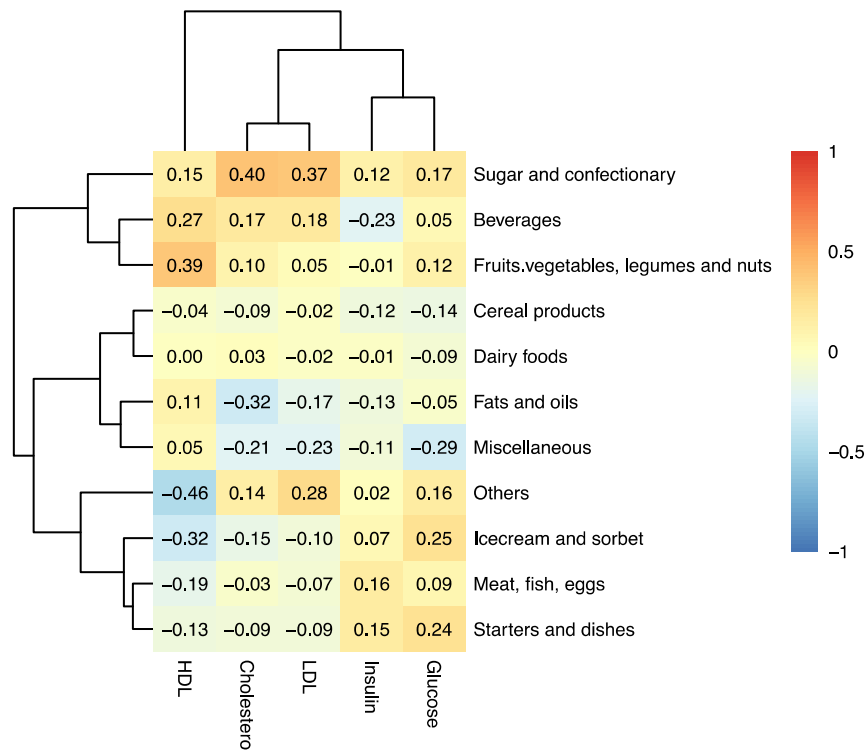

**Figure S4.** Associations between biochemical parameters that are significantly changed during the SC phase and all food groups evaluated using Spearman's correlation. Associations are colored and labelled according to Spearman rho, from -1 (negative association) to 1 (positive association). Significant associations are highlighted by a black border (FDR < 0.05). Hierarchical clustering is performed by Ward D2 method using Euclidean distances.

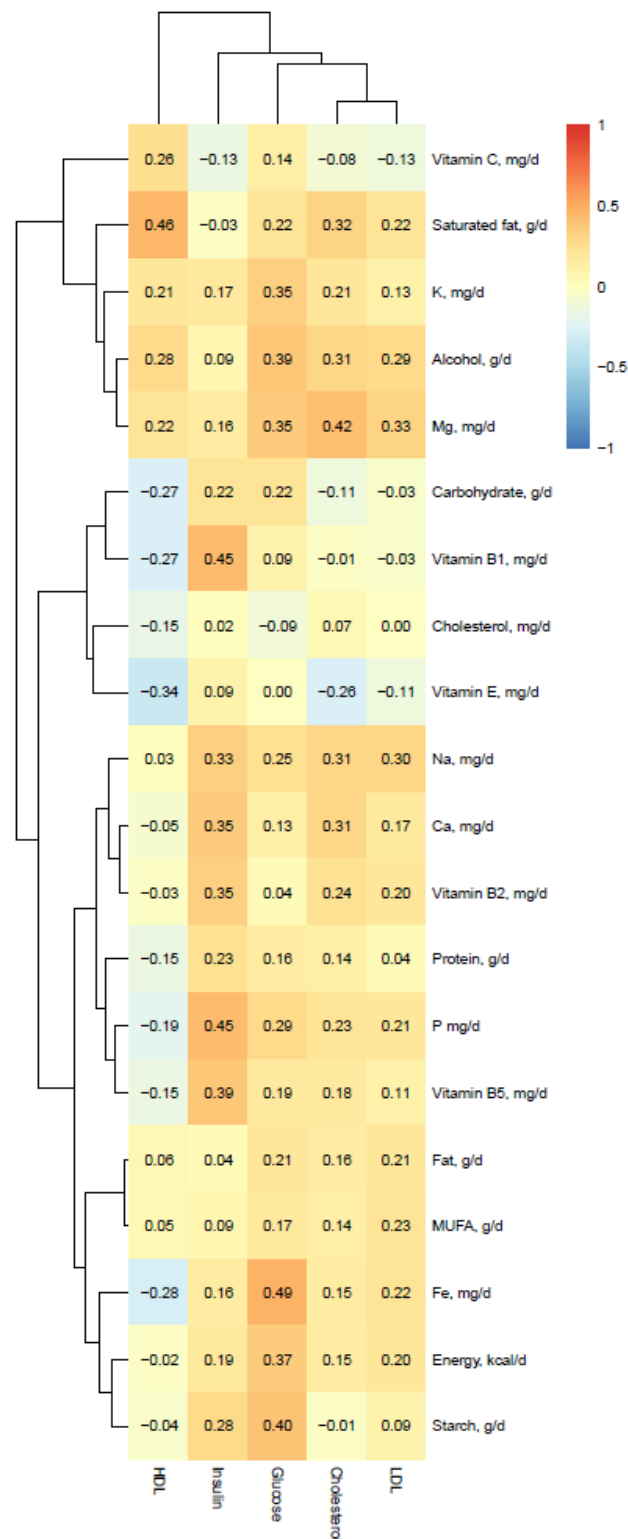

**Figure S5.** Associations between biochemical parameters and nutrients that are significantly changed by the SC phase (diet effect or interaction), evaluated using Spearman's correlation. Associations are colored and labelled according to Spearman rho, from -1 (negative association) to 1 (positive association). Significant associations are highlighted by a black border (FDR < 0.05). Hierarchical clustering is performed by Ward D2 method using Euclidean distances.

**Table S1.** Dietary restriction guidelines for the volunteers (original document in French).

| Food group                                          | Allowed                                                                                                                                                                                                          | Not allowed                                                                                                                                                                                                                                                                                                                                                                                             |
|-----------------------------------------------------|------------------------------------------------------------------------------------------------------------------------------------------------------------------------------------------------------------------|---------------------------------------------------------------------------------------------------------------------------------------------------------------------------------------------------------------------------------------------------------------------------------------------------------------------------------------------------------------------------------------------------------|
| Cereal products                                     | Breakfast cereals*<br>Unleavened bread<br>Rice cakes<br>Wheat or corn tortillas, plain Indian bread (or naan)<br>Commercial crackers without yeast * (buckwheat, chestnut, multigrain, quinoa)                   | <b>Fermented cereals:</b><br>All traditional breads made with baker's yeast, sourdough bread, pastries (croissant, pain au chocolate, braid, brioche ...), pancakes, rusks, crunchy sandwiches (e.g. Cracotte®), toasted breads, Swedish breads<br><b>All products with yeast</b> (exception: yeast extract)                                                                                            |
| Fruits and vegetables                               | Fresh, frozen, canned, sterilized fruit and vegetables<br>Juices, purees, compotes, sorbets<br>Soups *<br>Nuts (almonds, hazelnuts, walnuts, cashews, peanuts)                                                   | <b>Fermented vegetables:</b> pickles, olives, sauerkraut, fermented bamboo, pickled vegetables and other pickled vegetables, lacto-fermented vegetables (soaked in brine), kimchi (fermented cabbage with shallot, peppers, ginger) and lacto-fermented vegetable and plant juices<br><b>Fermented fruits:</b> candied lemons, salted umeboshi plums, fruit kefir (e.g. tibicos)<br><b>Dried fruits</b> |
| Legumes                                             | Lentils, chickpeas, split peas, red beans, white beans, flageolet beans<br>Fresh and canned sterilized soybeans, firm or silky tofu                                                                              | Soy sauce (or Shoyu), tamari<br>Soy desserts<br>Fermented soy cheeses (e.g. Sojami®, Sojabio®)<br>Fermented soybeans: tempeh, miso, natto                                                                                                                                                                                                                                                               |
| Starchy food                                        | Pasta, wheat, bulgur, semolina, flour<br>Rice<br>Corn, cornstarch<br>Quinoa<br>Potatoes                                                                                                                          | Store-bought preparations and ready meals (potato flakes for mash, potato gratin, shepherd's pie ...) "which contain dairy products "(check labels)                                                                                                                                                                                                                                                     |
| Meat from ruminant animals: veal, beef, lamb, sheep | Fresh or frozen plain meats: all pieces                                                                                                                                                                          | <b>Products derived from ruminant meat</b> (broths, corned beef, merguez) and cured meats (dried meat from Grisons, meat sausages, beef or donkey)                                                                                                                                                                                                                                                      |
| Pork                                                | Roasted or pan-fried fillet<br>Roasted, pan-fried, sautéed or grilled Tenderloin / filet mignon<br>Pork ribs<br>Poached, roasted or stewed shoulder or pallet<br>Grilled ribs<br>Grilled or poached fresh breast | <b>Cured pork:</b> ribs and ribs for salted snacks, <b>pork foot</b> , <b>half-salted smoked bacon</b><br><b>Processed meat (Charcuterie):</b> raw and dry ham, smoked cooked ham, bacon, speck, dry sausage, salami, chorizo, pepperoni, rillettes, cooked ham, ham, sausages                                                                                                                          |
| Other meat                                          | Fresh or frozen plain poultry: chicken, turkey, duck, guinea fowl, quail<br>Rabbit<br>Horse                                                                                                                      | <b>Marinated game meat</b>                                                                                                                                                                                                                                                                                                                                                                              |
| Fish and seafood                                    | Fresh, frozen, canned plain fish*                                                                                                                                                                                | <b>Salted fish:</b> sour herring (salted and smoked) and 'roll-mops', anchovies, haddock, salted and dried cod, smoked trout and salmon<br>Gravlax and marinated fish (specifically in vinegar)<br>Fish sauce or nuoc-mâm, caviar, bottarga                                                                                                                                                             |
| Egg                                                 | In all their forms: shell, soft-boiled, hard, fried, in a plain omelette<br>Store-bought egg-based preparations and meals that "do not contain dairy products "(look at the labels)                              | Commercial preparations and ready meals made from eggs and "which contain dairy products "(check labels)                                                                                                                                                                                                                                                                                                |
| Dairy products                                      |                                                                                                                                                                                                                  | <b>Milk &amp; fermented milks</b> (Ribot milk, kefir, koumis, lassi, leben), whey or buttermilk, cheeses, quark, serac, yogurts, white cheeses, faisselles (fromage blanc), fromage frais ('petits suisses')(e.g. Actimel®, Activia®) ...<br><b>Smoothies, milkshakes</b><br><b>Concentrated milk</b>                                                                                                   |

|                                                 |                                                                                                                                                          |                                                                                                                                                                                                                                                                                                         |
|-------------------------------------------------|----------------------------------------------------------------------------------------------------------------------------------------------------------|---------------------------------------------------------------------------------------------------------------------------------------------------------------------------------------------------------------------------------------------------------------------------------------------------------|
| Home-made food or ready-to-eat food from stores | Biscuits & cakes (recipes without milk / dairy products, without butter)<br>Commercial preparations "which do not contain dairy products" (check labels) | Biscuits & cakes, home or store "which contain dairy" (check labels)<br><b>Dairy desserts:</b> dessert cream, crème brûlée, custard, cream<br>pastry, dairy desserts & ice cream<br>Pizzas & quiches<br>Industrial sandwiches                                                                           |
| Fat                                             | 100% vegetable margarines<br>Vegetable oils: olive, sunflower, rapeseed, grape seeds, walnuts, hazelnuts, peanuts, soy                                   | <b>Dairy fat:</b> Unsalted, semi-salted, salted butter<br>Crème fraîche, coffee cream, sour cream                                                                                                                                                                                                       |
| Condiments and sauces                           | Coulis, pulp, pureed tomatoes<br>Vegetable broth<br>Soybean cooking                                                                                      | Wine vinegar, cider vinegar, mustard, homemade or store-bought vinaigrette sauces Mayonnaise, ketchup, tabasco, Viandox® sauce, bouillon of meat, Soy sauce or shoyu, Maggi ® sauce, fish sauce or nuoc-mâm, Worcestershire ® Chutney sauce or sweet and sour sauce<br>Pesto sauce                      |
| Drinks                                          | Water (if possible rich in calcium)<br>Fruit juices and herbal teas<br>Green tea & white tea<br>Almond drink *<br>Soy drink *                            | Black tea, kombuch, coffee, cappuccino, chocolate drinks (e.g. Ovomaltine®)<br>Milk, water & fruit kefirs, cereal drinks (oats, rice, etc.)<br>Energy drinks, regular, low-sugar and sugar-free sodas<br><b>All alcoholic drinks:</b> wine, beer (with or without alcohol), cider, mead, whiskey, vodka |
| Sugary products                                 | Jam, honey, sugar (maximum 20 g per day, i.e. 4 lumps of sugar n ° 4 or 4 tsp), sour candy.                                                              | Milk, cocoa & chocolate spread, milk concentrate, vanilla, caramels (in all its forms), low-fat confectionery in sugar or without sugar (candy, chewing gum)                                                                                                                                            |
| Divers                                          | Baking powder / sodium bicarbonate                                                                                                                       | All food supplements<br>Baker's yeast<br>Diet yeast                                                                                                                                                                                                                                                     |

\*Ready-to-eat meals from stores may contain dairy products and / or fermented foods, please check the labels.

**Table S2.** Classification of food groups based on French Agency for Food, Environmental and Occupational Health & Safety (ANSES).

| Food groups                           | Food subgroups                 | Food                           |
|---------------------------------------|--------------------------------|--------------------------------|
| Beverages                             | Alcohol                        | Beers                          |
|                                       |                                | Cider                          |
|                                       |                                | Cocktails                      |
|                                       |                                | Liqueurs                       |
|                                       |                                | Wine                           |
|                                       | Coffee, tea, and cocoa         | Coffee tea cocoa drinks        |
|                                       |                                | Coffee tea cocoa powders       |
|                                       | Juice                          | Juice                          |
|                                       | Non-alcoholic drinks           | Homemade drinks                |
|                                       | Plant-based drinks             | Plant-based drinks             |
| Soft drinks                           | Soft drinks with sugar         |                                |
|                                       | Soft drinks without sugar      |                                |
| Water                                 | Water                          |                                |
| Cereal products                       | Bread products                 | Bread                          |
|                                       |                                | Special bread                  |
|                                       |                                | Toasts rusks                   |
|                                       | Flour                          | Flour starches                 |
|                                       | Pasta, rice, and cereals       | Cooked pasta semolina          |
|                                       |                                | Cooked rice grains             |
|                                       |                                | Dough                          |
|                                       |                                | Raw pasta semolina             |
| Raw rice grains                       |                                |                                |
| Dairy products                        | Cheese                         | Cheese                         |
|                                       | Cream                          | Creams                         |
|                                       | Dairy fat*                     | Butter                         |
|                                       | Fresh fermented dairy products | Fresh dairy desserts           |
|                                       |                                | Cultured soft cheese           |
|                                       | Yogurt                         |                                |
|                                       | Milk                           | Milk                           |
| Other dairy desserts                  | Canned dairy desserts          |                                |
|                                       | Concentrated or powdered milk  |                                |
| Fats and oils                         | Animal fat                     | Other animal fats              |
|                                       | Margarines                     | Margarines                     |
|                                       | Vegetable fats                 | Vegetable oils                 |
| Fruits, vegetables, legumes, and nuts | Fruits                         | Canned fruits                  |
|                                       |                                | Compotes                       |
|                                       |                                | Dried freeze dried fruits      |
|                                       |                                | Fruits jams                    |
|                                       |                                | Other processed fruit products |
|                                       | Raw fruits                     |                                |
|                                       | Nuts                           | Nuts                           |
|                                       | Potatoes                       | Root vegetables                |
|                                       | Vegetables                     | Cooked vegetables              |
|                                       |                                | Dried dehydrated vegetables    |
| Raw vegetables                        |                                |                                |
| Salad                                 |                                |                                |
| Ice cream and sorbet                  | Ice cream and sorbet           | Ice cream sorbet               |
| Meat, fish, eggs                      | Eggs                           | Egg derivatives                |
|                                       | Fish and seafood               | Canned fish products           |
|                                       |                                | Cooked fish                    |
|                                       |                                | Fried fish                     |
|                                       |                                | Other fish based products      |
|                                       |                                | Raw fish                       |
|                                       |                                | Sea food                       |
|                                       |                                | Smoked fish                    |
|                                       | Offal**                        | Offal                          |
|                                       | Poultry**                      | Poultry                        |
| Processed meat                        | Cooked ham                     |                                |



|                         |                              |                                             |
|-------------------------|------------------------------|---------------------------------------------|
|                         |                              | Dried raw ham                               |
|                         |                              | Dry sausages                                |
|                         |                              | Dumplings                                   |
|                         |                              | Other special cured meats                   |
|                         |                              | Pâté terrine                                |
|                         |                              | Rillettes                                   |
|                         |                              | Sausages                                    |
|                         |                              | Meat                                        |
| Miscellaneous           | Red meat**                   |                                             |
|                         | Condiments                   | Condiments                                  |
|                         | Cooking aids                 | Culinary aids                               |
|                         | Ingredients                  | Chemical yeast bicarbonate                  |
|                         | Sauce                        | Salted sauces condiments                    |
|                         |                              | Savory sauces                               |
|                         |                              | Sweet sauces                                |
|                         | Spices                       | Dried spices                                |
|                         |                              | Fresh spices                                |
|                         |                              | Spices                                      |
| Others ***              | Alternative cheese           | Cheese alternatives                         |
|                         | Non-dairy desserts           | Soy dessert                                 |
|                         | Non-fermented bread products | Non fermented and non-dairy bread           |
|                         | Non-fermented sweet biscuits | Non fermented and non-dairy sugary biscuits |
|                         | Non-fermented tea            | Green tea infusion                          |
| Starters and dishes     | Cereal composite dish        | Cereal pasta dishes                         |
|                         |                              | Vegetable legume dishes                     |
|                         | Fish composite dish          | Fish dishes without garnish                 |
|                         |                              | Meat poultry dish with starchy foods        |
|                         | Meat composite dish          | Meat poultry dish with vegetables           |
|                         |                              | Meat poultry dishes without garnish         |
|                         | Pizza                        | Pizza pancakes savory tarts                 |
|                         | Sandwiches                   | Sandwiches                                  |
|                         | Soup                         | Soups                                       |
|                         | Starters                     | Puff pastry savory cakes                    |
|                         |                              | Savory biscuits                             |
|                         | Vegetable composite dish     | Fish dish with starchy foods                |
| Sugar and confectionary | Breakfast cereals            | Crunchy muesli                              |
|                         |                              | Filled breakfast cereals                    |
|                         |                              | Healthy breakfast cereals                   |
|                         |                              | Muesli                                      |
|                         |                              | Not filled chocolate breakfast cereals      |
|                         |                              | Other breakfast cereals                     |
|                         |                              | Rich fiber breakfast cereals                |
|                         |                              | Sugary honey caramel breakfast cereals      |
|                         | Cakes and pastries           | Cakes pastries                              |
|                         | Cereal bars                  | Cereal bars                                 |
|                         | Chocolate products           | Chocolate products                          |
|                         | Jam                          | Jam                                         |
|                         | Non-chocolate confectionery  | Non chocolate confectionery                 |
|                         | Non-dairy desserts ****      | Fresh non-dairy desserts                    |
|                         | Sugars and honey             | Sugar honey syrup                           |
|                         | Sweet biscuits               | Sweet biscuits                              |
|                         | Viennese pastries            | Brioche                                     |

\*The food composition table CIQUAL® classifies dairy fats under “fats and oils”. Due to the specificities of this study, dairy fats are classified under “dairy products”. \*\*CIQUAL® separates cooked and raw meat. This study classifies by the type of meat. \*\*\*These groups are added in the diet to substitute the exclusion of dairy and fermented food. \*\*\*\*CIQUAL® includes this dairy substitute in “dairy products”; in this study this product is separated to allow an assessment of dairy food intake.

**Table S3.** Fasting free fatty acids in serum (median (IQR)) during observation and semi-controlled diet periods in young and older men.

| Free fatty acids (mg/L)                    | YA                      |                         | OA                        |                           | <i>P</i> -value<br>(Wilcoxon 1) | <i>P</i> -value (Wald test) <sup>a</sup> |                |              |
|--------------------------------------------|-------------------------|-------------------------|---------------------------|---------------------------|---------------------------------|------------------------------------------|----------------|--------------|
|                                            | OB phase<br>(V1)        | SC phase<br>(V3)        | OB phase<br>(V1)          | SC phase<br>(V3)          | Baseline<br>OA vs YA            | Age<br>effect                            | Diet<br>effect | Interaction  |
| <b>Saturated fatty acids (SFA)</b>         |                         |                         |                           |                           |                                 |                                          |                |              |
| Butanoic acid                              | 0.006 (0.004, 0.010)    | 0.010 (0.008, 0.013)    | 0.010 (0.005, 0.015)      | 0.008 (0.005, 0.012)      | 0.259                           | 0.488                                    | 0.449          | 0.190        |
| Pentanoic acid                             | 0.006 (0.003, 0.009)    | 0.007 (0.005, 0.010)    | 0.005 (0.004, 0.010)      | 0.008 (0.003, 0.011)      | 0.583                           | 0.939                                    | 0.645          | 0.445        |
| Hexanoic acid                              | 0.005 (0.004, 0.008)    | 0.007 (0.005, 0.009)    | 0.007 (0.006, 0.014)      | 0.009 (0.004, 0.012)      | 0.185                           | 0.404                                    | 0.928          | 0.240        |
| Heptanoic acid                             | 0.007 (0.005, 0.011)    | 0.007 (0.004, 0.008)    | 0.008 (0.004, 0.011)      | 0.009 (0.005, 0.014)      | 0.905                           | 0.524                                    | 0.816          | 0.276        |
| Octanoic acid                              | 0.006 (0.004, 0.009)    | 0.005 (0.004, 0.007)    | 0.006 (0.004, 0.008)      | 0.008 (0.004, 0.011)      | 0.756                           | 0.306                                    | 0.895          | 0.328        |
| Nonanoic acid                              | 0.007 (0.004, 0.009)    | 0.005 (0.003, 0.009)    | 0.005 (0.003, 0.007)      | 0.009 (0.003, 0.011)      | 0.325                           | 0.868                                    | 0.675          | 0.096        |
| Decanoic acid                              | 0.006 (0.003, 0.007)    | 0.004 (0.003, 0.008)    | 0.005 (0.003, 0.010)      | 0.006 (0.004, 0.010)      | 1.000                           | 0.506                                    | 0.766          | 0.441        |
| Dodecanoic acid                            | 0.403 (0.357, 0.621)    | 0.510 (0.311, 0.728)    | 0.543 (0.330, 0.694)      | 0.432 (0.296, 0.610)      | 0.583                           | 0.961                                    | 0.733          | 0.286        |
| 11-Methyldodecanoic acid (C13 iso)         | 0.004 (0.003, 0.006)    | 0.003 (0.003, 0.005)    | 0.003 (0.002, 0.005)      | 0.004 (0.003, 0.005)      | 0.302                           | 0.877                                    | 0.580          | 0.153        |
| 12-Methyltridecanoic acid (C14 iso)        | 0.004 (0.003, 0.007)    | 0.006 (0.003, 0.008)    | 0.004 (0.003, 0.006)      | 0.005 (0.003, 0.009)      | 0.943                           | 0.871                                    | 0.724          | 0.688        |
| Tetradecanoic acid                         | 2.708 (2.509, 3.199)    | 2.928 (2.061, 3.631)    | 3.330 (2.613, 4.482)      | 2.560 (2.106, 3.995)      | 0.259                           | 0.536                                    | 0.131          | 0.223        |
| 13-Methyltetradecanoic acid (C15 iso)      | 0.111 (0.103, 0.128)    | 0.106 (0.082, 0.174)    | 0.153 (0.124, 0.177) #    | 0.113 (0.107, 0.205)      | <b>0.019</b>                    | <b>0.029</b>                             | 0.478          | 0.605        |
| 12-Methyltetradecanoic acid (C15 aiso)     | 0.292 (0.230, 0.336)    | 0.285 (0.202, 0.359)    | 0.356 (0.273, 0.422)      | 0.283 (0.250, 0.309) *    | 0.061                           | 0.438                                    | <b>0.034</b>   | 0.079        |
| Pentadecanoic acid                         | 0.695 (0.618, 0.794)    | 0.635 (0.547, 0.788)    | 0.965 (0.760, 1.105) #    | 0.744 (0.653, 0.930) *    | <b>0.002</b>                    | <b>0.005</b>                             | <b>0.030</b>   | 0.152        |
| 14-Methylpentadecanoic acid (C16 iso)      | 0.244 (0.214, 0.282)    | 0.211 (0.137, 0.248)    | 0.270 (0.242, 0.312)      | 0.197 (0.163, 0.227) *    | 0.116                           | 0.642                                    | < <b>0.001</b> | <b>0.048</b> |
| Hexadecanoic acid                          | 68.312 (63.923, 79.961) | 67.890 (62.313, 72.855) | 80.066 (77.365, 88.067) # | 76.445 (63.816, 90.896)   | <b>0.033</b>                    | <b>0.047</b>                             | 0.165          | 0.207        |
| 15-Methylhexadecanoic acid (C17 iso)       | 0.423 (0.337, 0.509)    | 0.329 (0.246, 0.473)    | 0.575 (0.505, 0.696) #    | 0.364 (0.298, 0.442) *    | <b>0.011</b>                    | 0.064                                    | < <b>0.001</b> | <b>0.038</b> |
| 14-Methylhexadecanoic acid (C17 aiso)      | 0.181 (0.068, 0.216)    | 0.100 (0.064, 0.168)    | 0.214 (0.059, 0.367)      | 0.099 (0.083, 0.177)      | 0.259                           | 0.334                                    | <b>0.045</b>   | 0.764        |
| Heptadecanoic acid                         | 0.990 (0.945, 1.159)    | 1.006 (0.855, 1.309)    | 1.290 (1.206, 1.509) #    | 1.165 (0.981, 1.380)      | <b>0.001</b>                    | <b>0.001</b>                             | 0.289          | 0.132        |
| 16-Methylheptadecanoic acid (C18 iso)      | 0.008 (0.004, 0.143)    | 0.006 (0.004, 0.016)    | 0.018 (0.007, 0.187)      | 0.013 (0.005, 0.025)      | 0.155                           | 0.103                                    | 0.254          | 0.787        |
| Octadecanoic acid                          | 30.675 (27.271, 31.758) | 27.226 (26.156, 31.366) | 32.653 (32.311, 39.536) # | 30.009 (26.725, 33.140) * | <b>0.011</b>                    | <b>0.025</b>                             | <b>0.018</b>   | 0.190        |
| Nonadecanoic acid                          | 0.316 (0.219, 0.379)    | 0.342 (0.253, 0.390)    | 0.253 (0.175, 0.330)      | 0.239 (0.140, 0.349)      | 0.220                           | 0.121                                    | 0.641          | 0.721        |
| Icosanoic acid                             | 0.215 (0.184, 0.250)    | 0.267 (0.206, 0.300)    | 0.216 (0.187, 0.253)      | 0.256 (0.174, 0.277)      | 0.905                           | 0.456                                    | <b>0.041</b>   | 0.301        |
| Docosanoic acid                            | 0.341 (0.262, 0.390)    | 0.193 (0.174, 0.386)    | 0.356 (0.273, 0.424)      | 0.248 (0.220, 0.273) *    | 0.830                           | 0.851                                    | < <b>0.001</b> | 0.674        |
| <b>Unsaturated fatty acids (USFA)</b>      |                         |                         |                           |                           |                                 |                                          |                |              |
| <b>Mono-unsaturated fatty acids (MUFA)</b> |                         |                         |                           |                           |                                 |                                          |                |              |
| Dec-9-enoic acid                           | 0.005 (0.005, 0.009)    | 0.005 (0.004, 0.006)    | 0.005 (0.004, 0.008)      | 0.006 (0.003, 0.007)      | 0.905                           | 0.797                                    | 0.170          | 0.480        |
| Dodecenoic acid (unknown)                  | 0.004 (0.003, 0.006)    | 0.004 (0.003, 0.005)    | 0.004 (0.003, 0.005)      | 0.005 (0.003, 0.007)      | 0.943                           | 0.604                                    | 0.712          | 0.616        |
| 9E-tetradecenoic acid                      | 0.005 (0.004, 0.010)    | 0.004 (0.003, 0.009)    | 0.005 (0.004, 0.006)      | 0.005 (0.003, 0.010)      | 0.981                           | 0.836                                    | 0.406          | 0.795        |
| (Z)-Tetradec-9-enoic acid                  | 0.207 (0.166, 0.294)    | 0.243 (0.168, 0.343)    | 0.248 (0.224, 0.384)      | 0.212 (0.177, 0.395)      | 0.350                           | 0.486                                    | 0.641          | 0.408        |
| (E)-hexadec-9-enoic acid                   | 0.126 (0.109, 0.172)    | 0.109 (0.074, 0.167)    | 0.180 (0.136, 0.269)      | 0.141 (0.112, 0.175)      | 0.141                           | 0.090                                    | 0.183          | 0.873        |
| Hexadecenoic acid (unknown)                | 0.619 (0.522, 0.798)    | 0.822 (0.677, 0.927) *  | 0.745 (0.587, 0.954)      | 0.886 (0.714, 1.032)      | 0.325                           | 0.171                                    | < <b>0.001</b> | 0.600        |
| (Z)-Hexadec-9-enoic acid                   | 3.711 (2.959, 4.483)    | 4.648 (3.011, 5.465)    | 4.757 (3.586, 5.933)      | 4.511 (4.190, 6.176)      | 0.185                           | 0.236                                    | 0.142          | 0.359        |
| Hexadecenoic acid (unknown 2)              | 0.079 (0.059, 0.094)    | 0.079 (0.038, 0.093)    | 0.076 (0.058, 0.113)      | 0.088 (0.048, 0.116)      | 0.583                           | 0.298                                    | 0.849          | 0.678        |
| (Z)-Heptadec-10-enoic acid                 | 1.373 (0.976, 1.781)    | 1.501 (1.082, 2.066)    | 1.446 (1.064, 1.559)      | 1.509 (0.729, 1.720)      | 0.616                           | 0.531                                    | <b>0.008</b>   | 0.974        |

| Free fatty acids (mg/L)                                                                                       | YA                      |                           | OA                      |                         | P-value<br>(Wilcoxon 1) | P-value (Wald test) <sup>a</sup> |                   |             |
|---------------------------------------------------------------------------------------------------------------|-------------------------|---------------------------|-------------------------|-------------------------|-------------------------|----------------------------------|-------------------|-------------|
|                                                                                                               | OB phase<br>(V1)        | SC phase<br>(V3)          | OB phase<br>(V1)        | SC phase<br>(V3)        | Baseline<br>OA vs YA    | Age<br>effect                    | Diet<br>effect    | Interaction |
| (E)-Octadec-6-enoic acid + (E)-Octadec-9-enoic acid                                                           | 1.743 (1.450, 2.258)    | 1.847 (1.337, 2.423)      | 1.716 (1.533, 2.495)    | 1.668 (1.549, 2.823)    | 0.867                   | 0.934                            | 0.495             | 0.883       |
| (E)-Octadec-10-enoic acid + (E)-Octadec-11-enoic acid                                                         | 1.139 (1.039, 1.369)    | 1.046 (0.904, 1.225)      | 1.287 (1.106, 1.519)    | 1.106 (0.967, 1.262)    | 0.202                   | 0.170                            | <b>0.009</b>      | 0.668       |
| (E)-Octadec-12-enoic acid                                                                                     | 0.479 (0.445, 0.544)    | 0.498 (0.426, 0.561)      | 0.509 (0.469, 0.540)    | 0.481 (0.441, 0.563)    | 0.616                   | 0.706                            | 0.776             | 0.717       |
| (E)-Octadec-13-enoic acid + (Z)-Octadec-6-enoic acid + (Z)-Octadec-7-enoic acid + octadecenoic acid (unknown) | 0.521 (0.467, 0.628)    | 0.412 (0.355, 0.494) *    | 0.649 (0.537, 0.732)    | 0.452 (0.376, 0.545) *  | 0.076                   | 0.077                            | <b>&lt; 0.001</b> | 0.565       |
| (Z)-Octadec-9-enoic acid                                                                                      | 47.868 (36.725, 55.919) | 62.312 (52.540, 73.244) * | 51.090 (44.092, 61.618) | 63.823 (45.274, 78.196) | 0.402                   | 0.658                            | <b>0.001</b>      | 0.182       |
| (Z)-Octadec-11-enoic acid                                                                                     | 3.608 (3.038, 4.615)    | 4.841 (4.125, 5.285) *    | 4.492 (3.993, 5.094)    | 5.576 (4.218, 5.801)    | 0.068                   | 0.070                            | <b>0.001</b>      | 0.391       |
| (Z)-Octadec-12-enoic acid                                                                                     | 0.532 (0.456, 0.572)    | 0.407 (0.309, 0.500)      | 0.479 (0.423, 0.552)    | 0.430 (0.337, 0.551)    | 0.756                   | 0.915                            | <b>0.024</b>      | 0.505       |
| (Z)-Octadec-13-enoic acid                                                                                     | 0.169 (0.151, 0.194)    | 0.171 (0.148, 0.207)      | 0.188 (0.165, 0.199)    | 0.166 (0.151, 0.195)    | 0.239                   | 0.609                            | 0.215             | 0.228       |
| Octadecenoic acid (unknown)                                                                                   | 0.137 (0.061, 0.243)    | 0.151 (0.073, 0.325)      | 0.218 (0.123, 0.520)    | 0.215 (0.100, 0.500)    | 0.169                   | 0.179                            | 0.928             | 0.423       |
| (Z)-Octadec-15-enoic acid                                                                                     | 0.071 (0.056, 0.084)    | 0.065 (0.048, 0.076)      | 0.061 (0.056, 0.121)    | 0.056 (0.041, 0.073)    | 0.943                   | 0.833                            | 0.095             | 0.726       |
| (E)-Icos-11-enoic acid + (Z)-Icos-5-enoic acid                                                                | 0.077 (0.054, 0.085)    | 0.083 (0.065, 0.103)      | 0.089 (0.059, 0.125)    | 0.088 (0.057, 0.108)    | 0.169                   | 0.422                            | 0.580             | 0.130       |
| (Z)-Icos-8-enoic acid + (Z)-Icos-9-enoic acid                                                                 | 0.205 (0.073, 0.332)    | 0.105 (0.059, 0.312)      | 0.188 (0.102, 0.331)    | 0.258 (0.085, 0.313)    | 0.793                   | 0.537                            | 0.451             | 0.547       |
| (Z)-Icos-11-enoic acid                                                                                        | 0.661 (0.597, 0.978)    | 1.015 (0.845, 1.182) *    | 0.949 (0.690, 1.028)    | 1.074 (0.967, 1.116)    | 0.141                   | 0.350                            | <b>0.011</b>      | 0.351       |
| <b>Poly-unsaturated fatty acids (PUFA)</b>                                                                    |                         |                           |                         |                         |                         |                                  |                   |             |
| (9Z, 11Z)-Octadeca-9,11-dienoic acid                                                                          | 0.020 (0.016, 0.026)    | 0.020 (0.014, 0.024)      | 0.020 (0.013, 0.033)    | 0.024 (0.016, 0.050)    | 0.830                   | 0.457                            | 0.861             | 0.490       |
| (9Z,12Z)-Octadeca-9,12-dienoic acid                                                                           | 39.974 (37.295, 43.768) | 43.414 (38.812, 46.829)   | 42.929 (41.971, 47.338) | 42.728 (36.359, 47.244) | 0.169                   | 0.522                            | 0.826             | 0.176       |
| (9Z,11E)-Octadeca-9,11-dienoic acid + unknown                                                                 | 0.399 (0.306, 0.503)    | 0.325 (0.185, 0.414)      | 0.597 (0.421, 0.718) #  | 0.338 (0.281, 0.496) *  | <b>0.033</b>            | 0.062                            | <b>&lt; 0.001</b> | 0.348       |
| (10E,12Z)-Octadeca-10,12-dienoic acid                                                                         | 0.025 (0.012, 0.039)    | 0.017 (0.013, 0.032)      | 0.025 (0.015, 0.097)    | 0.015 (0.012, 0.073)    | 0.550                   | 0.701                            | 0.140             | 0.500       |
| (9E,11E)-Octadeca-9,11-dienoic acid                                                                           | 0.014 (0.007, 0.016)    | 0.014 (0.010, 0.018)      | 0.017 (0.013, 0.021)    | 0.017 (0.011, 0.022)    | 0.202                   | 0.135                            | 0.735             | 0.714       |
| (9E,12E)-Octadeca-9,12-dienoic acid                                                                           | 0.040 (0.032, 0.072)    | 0.059 (0.039, 0.098)      | 0.047 (0.039, 0.091)    | 0.052 (0.041, 0.114)    | 0.616                   | 0.836                            | 0.158             | 0.488       |
| ((9E,12Z)-Octadeca-9,12-dienoic acid) + unknown                                                               | 0.144 (0.095, 0.174)    | 0.109 (0.069, 0.159)      | 0.139 (0.102, 0.192)    | 0.124 (0.113, 0.160)    | 0.519                   | 0.439                            | 0.136             | 0.923       |
| Octadecadienoic acid (unknown)                                                                                | 0.137 (0.061, 0.243)    | 0.151 (0.073, 0.325)      | 0.218 (0.123, 0.520)    | 0.215 (0.100, 0.500)    | 0.169                   | 0.179                            | 0.928             | 0.423       |
| Octadecadienoic acid (unknown)                                                                                | 0.213 (0.168, 0.281)    | 0.226 (0.177, 0.294)      | 0.252 (0.211, 0.271)    | 0.231 (0.202, 0.310)    | 0.128                   | 0.241                            | 0.837             | 0.397       |
| Octadecadienoic acid (unknown)                                                                                | 0.087 (0.071, 0.112)    | 0.079 (0.053, 0.094)      | 0.103 (0.071, 0.140)    | 0.080 (0.071, 0.109)    | 0.430                   | 0.314                            | 0.067             | 0.953       |
| (6Z,9Z,12Z)-Octadeca-6,9,12-trienoic acid                                                                     | 0.512 (0.469, 0.595)    | 0.469 (0.414, 0.511)      | 0.473 (0.409, 0.587)    | 0.453 (0.307, 0.529)    | 0.458                   | 0.359                            | <b>0.024</b>      | 0.964       |
| (9Z,12Z,15Z)-Octadeca-9,12,15-trienoic acid                                                                   | 1.349 (1.066, 2.015)    | 1.802 (1.596, 2.110)      | 1.329 (1.304, 2.692)    | 1.853 (1.356, 2.338)    | 0.265                   | 0.423                            | <b>0.035</b>      | 0.468       |
| (6Z,9Z,12Z,15Z)-Octadeca-6,9,12,15-tetraenoic acid                                                            | 0.163 (0.108, 0.184)    | 0.134 (0.098, 0.165)      | 0.169 (0.023, 0.202)    | 0.153 (0.042, 0.182)    | 0.943                   | 0.984                            | 0.086             | 0.813       |
| (11Z,14Z)-Icosa-11,14-dienoic acid                                                                            | 0.518 (0.277, 0.622)    | 0.524 (0.361, 0.597)      | 0.518 (0.214, 0.748)    | 0.427 (0.197, 0.718)    | 0.550                   | 0.984                            | 0.876             | 0.183       |
| (8Z,11Z,14Z)-Icosa-8,11,14-trienoic acid                                                                      | 3.290 (2.967, 3.435)    | 2.799 (2.134, 3.301)      | 3.296 (2.624, 4.081)    | 2.285 (1.935, 2.898) *  | 0.756                   | 0.374                            | <b>&lt; 0.001</b> | 0.606       |
| (11Z,14Z,17Z)-Icosa-11,14,17-trienoic acid                                                                    | 0.065 (0.050, 0.085)    | 0.072 (0.065, 0.094)      | 0.089 (0.062, 0.121)    | 0.085 (0.071, 0.101)    | 0.128                   | 0.084                            | 0.377             | 0.527       |

| Free fatty acids (mg/L)                                             | YA                      |                         | OA                      |                         | <i>P</i> -value<br>(Wilcoxon 1) | <i>P</i> -value (Wald test) <sup>a</sup> |                   |             |
|---------------------------------------------------------------------|-------------------------|-------------------------|-------------------------|-------------------------|---------------------------------|------------------------------------------|-------------------|-------------|
|                                                                     | OB phase<br>(V1)        | SC phase<br>(V3)        | OB phase<br>(V1)        | SC phase<br>(V3)        | Baseline<br>OA vs YA            | Age<br>effect                            | Diet<br>effect    | Interaction |
| (5Z,8Z,11Z,14Z)-Icosa-5,8,11,14-tetraenoic acid                     | 14.182 (12.579, 17.122) | 14.929 (14.019, 16.649) | 16.792 (14.209, 18.547) | 14.777 (14.636, 16.639) | 0.141                           | 0.464                                    | 0.562             | 0.081       |
| (8Z,11Z,14Z,17Z)-Icosa-8,11,14,17-tetraenoic acid                   | 0.198 (0.148, 0.250)    | 0.137 (0.101, 0.174) *  | 0.209 (0.180, 0.269)    | 0.115 (0.098, 0.160) *  | 0.458                           | 0.800                                    | <b>&lt; 0.001</b> | 0.272       |
| (5Z,8Z,11Z,14Z,17Z)-Icosa-5,8,11,14,17-pentaenoic acid (EPA)        | 1.790 (1.327, 2.851)    | 1.950 (1.371, 2.657)    | 2.586 (2.412, 4.116) #  | 1.967 (1.721, 2.356) *  | <b>0.033</b>                    | 0.084                                    | 0.067             | 0.091       |
| (7Z,10Z,13Z,16Z,19Z)-Docosa-7,10,13,16,19-pentaenoic acid (DPA)     | 1.412 (1.219, 1.516)    | 1.247 (1.085, 1.441)    | 1.736 (1.526, 2.089) #  | 1.344 (1.181, 1.665) *  | <b>0.004</b>                    | <b>0.008</b>                             | <b>0.015</b>      | 0.192       |
| (4Z,7Z,10Z,13Z,16Z,19Z)-docosa-4,7,10,13,16,19-hexaenoic acid (DHA) | 4.848 (4.236, 5.554)    | 5.851 (4.795, 6.610)    | 7.778 (6.595, 9.296) #  | 7.226 (6.876, 7.607) #  | <b>&lt; 0.001</b>               | <b>&lt; 0.001</b>                        | 0.506             | 0.201       |

Differences in age group at baseline were assessed by a non-paired Wilcoxon signed-rank test (*P*-value < 0.05) (Wilcoxon 1); \* Significant difference between periods (diet effect, *P*-value < 0.05) by paired Wilcoxon signed-rank test (Wilcoxon 2); # Significant difference between groups (age effect, *P*-value < 0.05) by Wilcoxon signed-rank test (Wilcoxon 3); <sup>a</sup> *P*-value calculated by Wald Chi-Squared Test, statistical significance is indicated in bold when *P*-value < 0.05.

EPA: Eicosapentaenoic acid; DHA: Docosahexaenoic acid; DPA: Docosapentaenoic acid; IQR: interquartile range; MUFA: monounsaturated fatty acids; OA: older adult men; PUFA: polyunsaturated fatty acids; SFA: saturated fatty acids; USFA: unsaturated fatty acids; YA: younger adult men.
